# Supplementary material for: Factors associated with "Ikigai" among members of a public temporary employment agency for seniors (Silver Human Resources Centre) in Japan; gender differences
Source: Springer Nature journal article supplement (doi:10.1186/1477-7525-4-12), 2006-02-27
Supplement: Additional file 1 [file 1477-7525-4-12-s1.pdf]

Table1 Characteristics of the members of Silver Human Resources Center (SHRC) in Japan

|                                                         |                            | Total               | Male |                     | Female              |                     | N                   | %    | gender difference |
|---------------------------------------------------------|----------------------------|---------------------|------|---------------------|---------------------|---------------------|---------------------|------|-------------------|
| Age                                                     | < 60                       | 73                  | 1.7  | 20                  | 0.7                 | 53                  | 3.6                 |      |                   |
|                                                         | 60-64                      | 1161                | 26.6 | 726                 | 25.0                | 435                 | 29.8                |      |                   |
|                                                         | 65-69                      | 1545                | 35.3 | 1058                | 36.4                | 487                 | 33.3                |      |                   |
|                                                         | 70-74                      | 1043                | 23.9 | 716                 | 24.6                | 327                 | 22.4                | ***  |                   |
|                                                         | 75-79                      | 424                 | 9.7  | 305                 | 10.5                | 119                 | 8.1                 |      |                   |
|                                                         | 80-89                      | 123                 | 2.8  | 83                  | 2.9                 | 40                  | 2.7                 |      |                   |
|                                                         | ≥90                        | 2                   | 0.0  | 1                   | 0.0                 | 1                   | 0.1                 |      |                   |
| Family                                                  | living alone               | 504                 | 11.6 | 113                 | 3.9                 | 391                 | 26.9                |      |                   |
|                                                         | with spouse                | 2241                | 51.6 | 1737                | 60.1                | 504                 | 34.7                |      |                   |
|                                                         | 2 generations              | 796                 | 18.3 | 456                 | 15.8                | 340                 | 23.4                | ***  |                   |
|                                                         | 3generations               | 81                  | 1.9  | 64                  | 2.2                 | 17                  | 1.2                 |      |                   |
|                                                         | others                     | 719                 | 16.6 | 518                 | 17.9                | 201                 | 13.8                |      |                   |
| Number of rooms in one's residence (rooms)              | 1-2                        | 482                 | 11.0 | 250                 | 8.6                 | 232                 | 15.9                |      |                   |
|                                                         | 3                          | 1114                | 25.5 | 699                 | 24.1                | 415                 | 28.4                |      |                   |
|                                                         | 4                          | 993                 | 22.8 | 694                 | 23.9                | 299                 | 20.5                | ***  |                   |
|                                                         | 5                          | 1011                | 23.2 | 705                 | 24.3                | 306                 | 20.9                |      |                   |
|                                                         | ≥6                         | 764                 | 17.5 | 555                 | 19.1                | 209                 | 14.3                |      |                   |
|                                                         |                            |                     |      |                     |                     |                     |                     |      |                   |
| Annual income including pension benefits (million yen)  | < 1                        | 841                 | 19.7 | 228                 | 7.9                 | 613                 | 43.7                |      |                   |
|                                                         | 1-1.9                      | 1121                | 26.2 | 543                 | 18.9                | 578                 | 41.2                |      |                   |
|                                                         | 2-3.9                      | 1989                | 46.5 | 1803                | 62.8                | 186                 | 13.3                | ***  |                   |
|                                                         | 4-5.9                      | 291                 | 6.8  | 270                 | 9.4                 | 21                  | 1.5                 |      |                   |
|                                                         | ≥6                         | 31                  | 0.7  | 27                  | 0.9                 | 4                   | 0.3                 |      |                   |
| Satisfaction with one's living standard                 | very satisfy               | 721                 | 16.8 | 477                 | 16.7                | 244                 | 17.1                |      |                   |
|                                                         | satisfy                    | 2670                | 62.3 | 1814                | 63.5                | 856                 | 59.9                | n. s |                   |
|                                                         | not satisfy                | 895                 | 20.9 | 567                 | 19.8                | 328                 | 23.0                |      |                   |
| Subjective assessment of health condition               | very bad                   | 24                  | 0.6  | 17                  | 0.6                 | 7                   | 0.5                 |      |                   |
|                                                         | bad                        | 312                 | 7.2  | 212                 | 7.3                 | 100                 | 6.9                 |      |                   |
|                                                         | average                    | 2241                | 51.6 | 1522                | 52.7                | 719                 | 49.6                | ***  |                   |
|                                                         | good                       | 912                 | 21.0 | 615                 | 21.3                | 297                 | 20.5                |      |                   |
|                                                         | very good                  | 850                 | 19.6 | 522                 | 18.1                | 328                 | 22.6                |      |                   |
| Hospitalization during the past year                    | none                       | 4100                | 93.7 | 2705                | 92.9                | 1395                | 95.4                | ***  |                   |
|                                                         | ≥1                         | 276                 | 6.3  | 208                 | 7.1                 | 68                  | 4.6                 |      |                   |
| Seeking medical consultation during the                 |                            | Mean±SD=21.63±35.36 |      |                     | Mean±SD= 21.63±35.3 |                     | Mean±SD=21.64±35.49 |      | n. s              |
| Healthy lifestyle score (Breslow: 0-7)                  |                            | Mean±SD=3.58±1.89   |      | Mean±SD=3.62±1.9    |                     | Mean±SD=3.50±1.86   |                     | **   |                   |
| Numbers of working days through SHRC (0-250 days)       |                            | Mean±SD=95.58±75.21 |      | Mean±SD=99.86±76.02 |                     | Mean±SD=86.63±72.74 |                     | ***  |                   |
| Initial purpose of work through SHRC                    | financial benefit          | 1332                | 31.5 | 887                 | 31.4                | 445                 | 31.6                |      |                   |
|                                                         | health maintenance         | 1674                | 39.5 | 1166                | 41.2                | 508                 | 36.1                |      |                   |
|                                                         | communicating with friends | 795                 | 18.8 | 475                 | 16.8                | 320                 | 22.7                | n. s |                   |
|                                                         | others                     | 434                 | 10.2 | 300                 | 10.6                | 134                 | 9.5                 |      |                   |
| Life-change score through work (-3, -2, -1, 0, 1, 2, 3) | -3                         | 30                  | 0.7  | 20                  | 0.7                 | 10                  | 0.7                 |      |                   |
|                                                         | -2                         | 44                  | 1.1  | 38                  | 1.4                 | 6                   | 0.4                 |      |                   |
|                                                         | -1                         | 128                 | 3.1  | 98                  | 3.5                 | 30                  | 2.2                 |      |                   |
|                                                         | 0                          | 1055                | 25.5 | 715                 | 25.6                | 340                 | 25.3                | **   |                   |
|                                                         | 1                          | 762                 | 18.4 | 512                 | 18.4                | 250                 | 18.6                |      |                   |
|                                                         | 2                          | 792                 | 19.2 | 533                 | 19.1                | 259                 | 19.3                |      |                   |
|                                                         | 3                          | 1322                | 32.0 | 873                 | 31.3                | 449                 | 33.4                |      |                   |
| Satisfaction with my life history                       | no                         | 674                 | 16.2 | 475                 | 17.0                | 199                 | 14.5                | **   |                   |
|                                                         | yes                        | 3495                | 83.8 | 2319                | 83.0                | 1176                | 85.5                |      |                   |
| Wish to contribute to society                           | no                         | 3151                | 72.0 | 2070                | 71.1                | 1081                | 73.9                | **   |                   |
|                                                         | yes                        | 1225                | 28.0 | 843                 | 28.9                | 382                 | 26.1                |      |                   |
| Wish to have time for myself                            | no                         | 3433                | 78.5 | 2261                | 77.6                | 1172                | 80.1                | *    |                   |
|                                                         | yes                        | 943                 | 21.5 | 652                 | 22.4                | 291                 | 19.9                |      |                   |
| Total                                                   |                            | 4376                | 100  | 2913                | 100                 | 1463                | 100                 |      |                   |

Gender difference were examined by kruskal wallis and ANOVA

\*p < 0.1 \*\* p < 0.05 \*\*\*p < 0.001
