# Supplementary material for: Factors associated with "Ikigai" among members of a public temporary employment agency for seniors (Silver Human Resources Centre) in Japan; gender differences
Source: Springer Nature journal article supplement (doi:10.1186/1477-7525-4-12), 2006-02-27
Supplement: Additional file 2 [file 1477-7525-4-12-s2.pdf]

Table2 Factors associated with "Ikigai" score

| variables                                       | Total |           |  | Male |           |  | Female |           |  |
|-------------------------------------------------|-------|-----------|--|------|-----------|--|--------|-----------|--|
|                                                 | SE    | $\beta$   |  | SE   | $\beta$   |  | SE     | $\beta$   |  |
| Age (year)                                      | 0.02  | -0.04 *** |  | 0.03 | -0.01     |  | 0.04   | -0.08 *** |  |
| Sex (male=1, female=0)                          | 0.07  | -0.20 *** |  |      |           |  |        |           |  |
| Spouse (yes=1)                                  | 0.07  | 0.04 **   |  | 0.10 | 0.03      |  | 0.09   | 0.02      |  |
| Number of rooms in one's residence (rooms)      | 0.02  | 0.07 ***  |  | 0.02 | 0.06 ***  |  | 0.03   | 0.07 **   |  |
| Annual income including pension benefits (mill) | 0.03  | 0.09 ***  |  | 0.04 | 0.11 ***  |  | 0.06   | 0.03      |  |
| Subjective assessment of health condition (1-7) | 0.03  | 0.02      |  | 0.03 | 0.02      |  | 0.05   | 0.02      |  |
| Hospitalization during the past year (yes=1)    | 0.10  | 0.01      |  | 0.11 | 0.01      |  | 0.21   | 0.00      |  |
| Healthy lifestyle score (Breslow: 0-7)          | 0.01  | 0.26 ***  |  | 0.02 | 0.24 ***  |  | 0.02   | 0.29 ***  |  |
| Numbers of working days through SHRC (0-250)    | 0.02  | 0.02      |  | 0.03 | 0.03      |  | 0.04   | 0.01      |  |
| Purpose of work (for financial benefit=1)       | 0.07  | -0.08 *** |  | 0.08 | -0.11 *** |  | 0.11   | -0.04     |  |
| Purpose of work (for health=1)                  | 0.06  | -0.05 *** |  | 0.07 | -0.07 *** |  | 0.11   | -0.01     |  |
| Life-change score through work (-3 to 3)        | 0.02  | 0.17 ***  |  | 0.02 | 0.18 ***  |  | 0.03   | 0.16 ***  |  |
| Satisfaction on my life history (yes=1)         | 0.08  | 0.10 ***  |  | 0.09 | 0.09 ***  |  | 0.14   | 0.11 ***  |  |
| Wish to contribute to society (yes=1)           | 0.06  | 0.03      |  | 0.08 | 0.04 *    |  | 0.11   | -0.01     |  |
| Wish to have time for myself (yes=1)            | 0.07  | -0.05 *** |  | 0.08 | -0.04 *   |  | 0.12   | -0.05 *   |  |
| Adjusted R <sup>2</sup>                         |       | 0.20      |  |      | 0.19      |  |        | 0.17      |  |

\* p &lt; 0.1 \*\* p &lt; 0.05 \*\*\*p &lt; 0.001
